# Supplementary figures and images for: Cu(II) and Ni(II) Complexes with New Tridentate NNS Thiosemicarbazones: Synthesis, Characterisation, DNA Interaction, and Antibacterial Activity
Source: Hindawi journal article supplement (doi:10.1155/2019/3520837), 2019-07-01

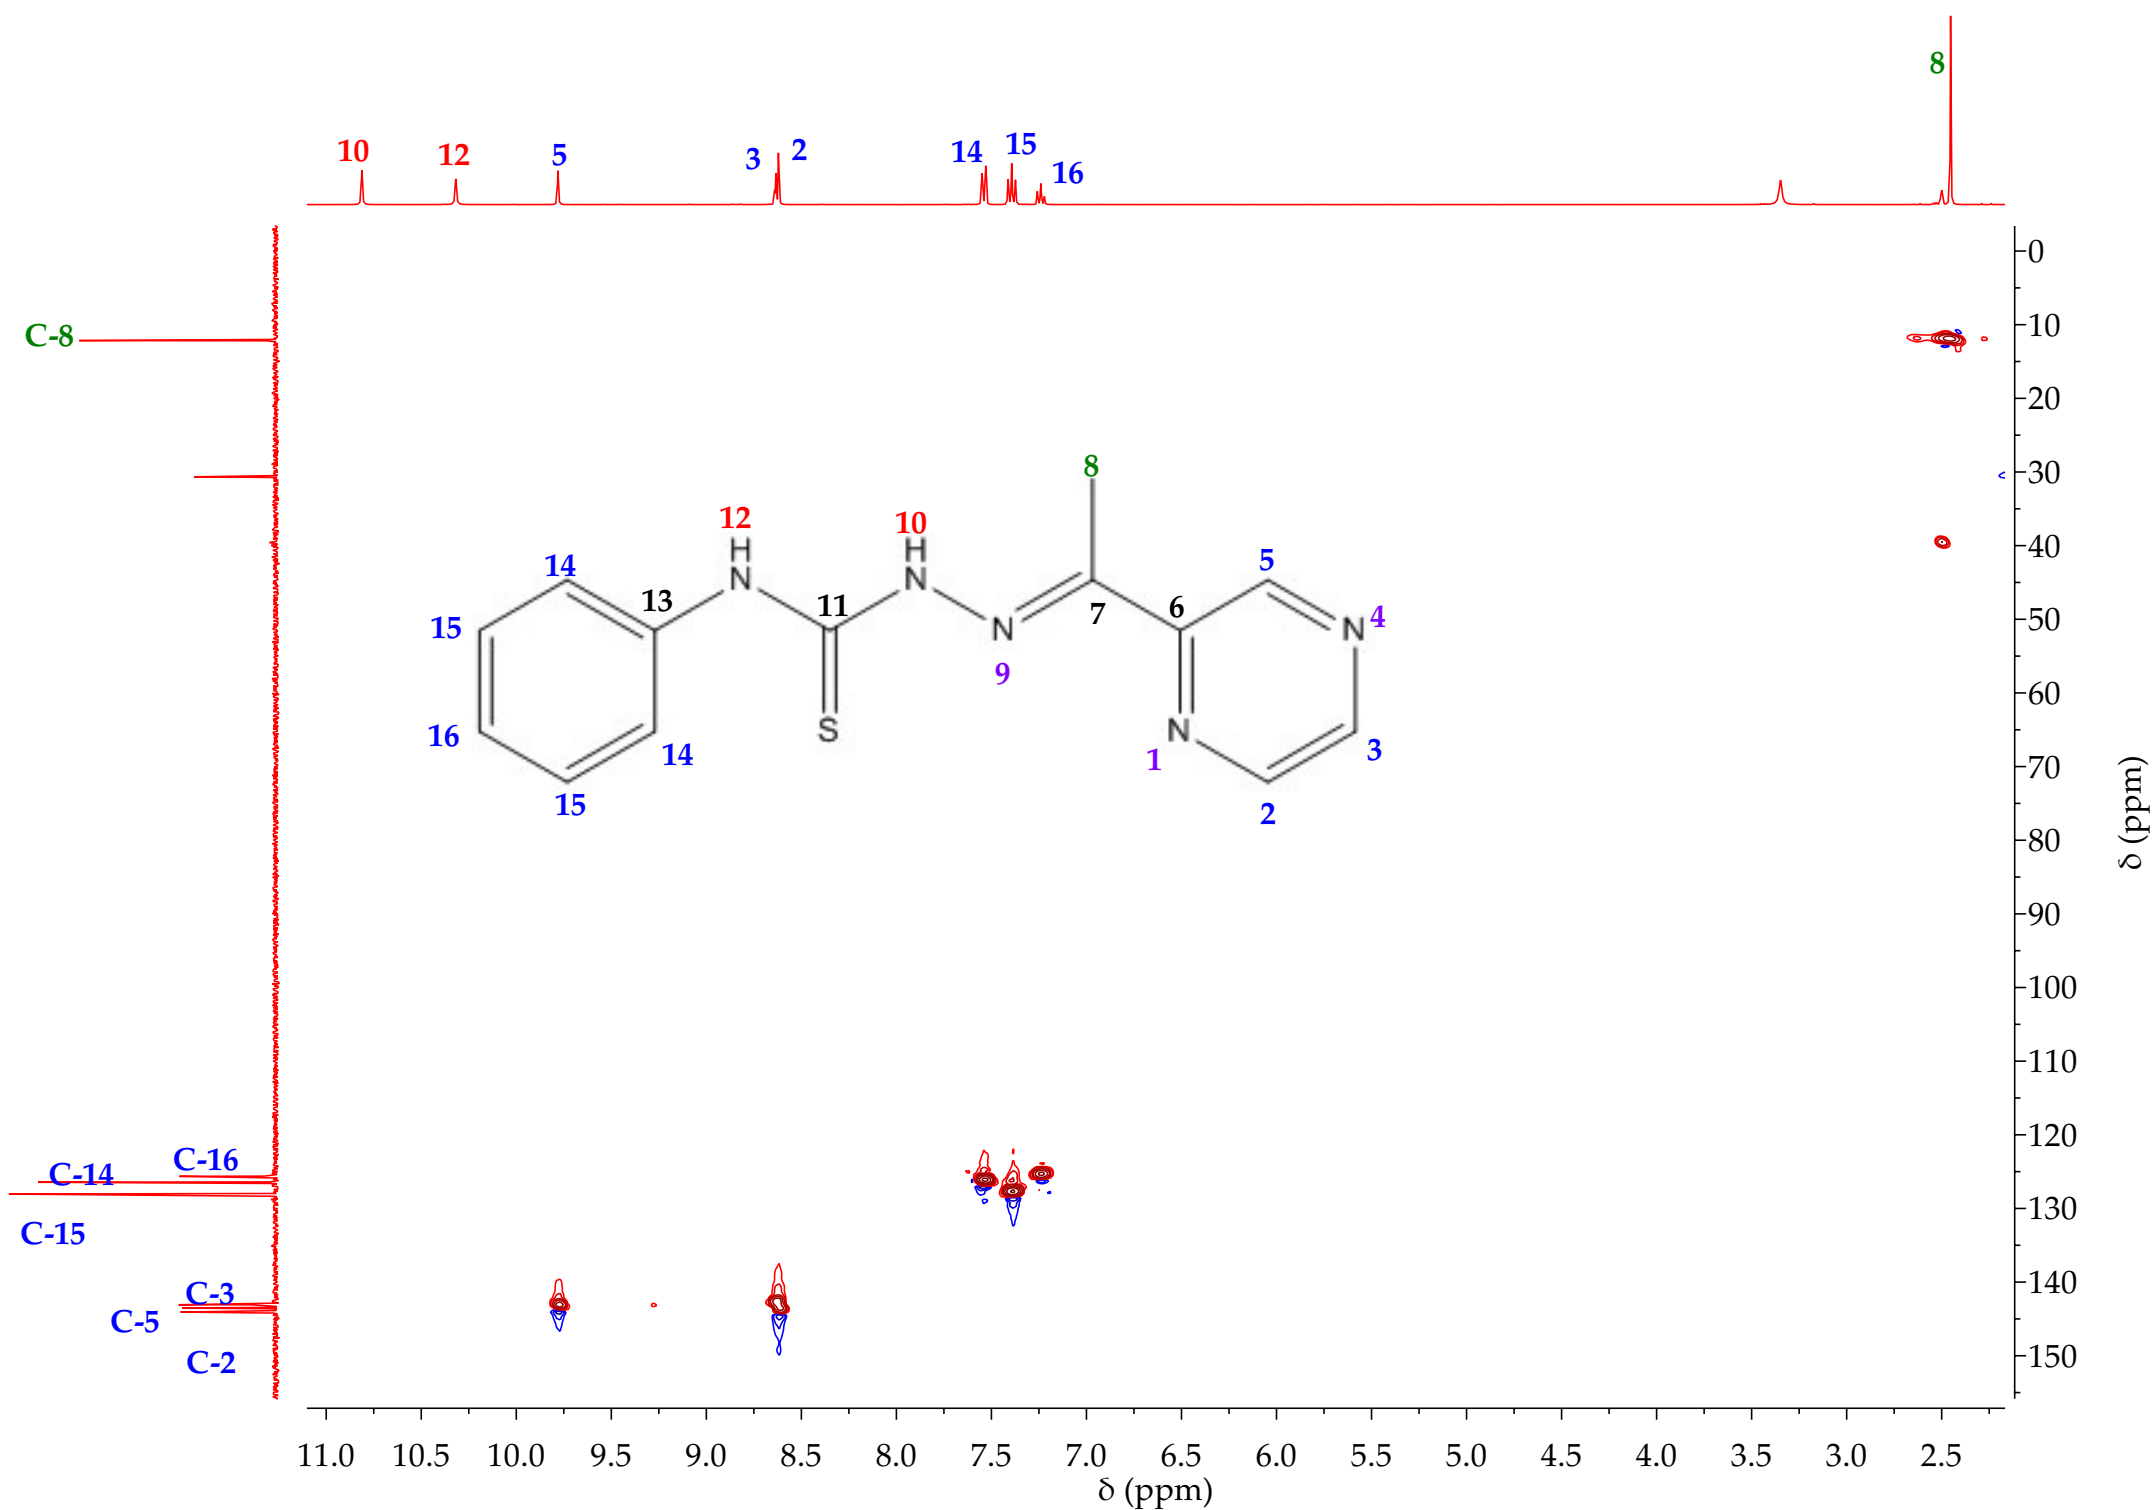

Supplement: f1 [file 3520837.f1.zip]

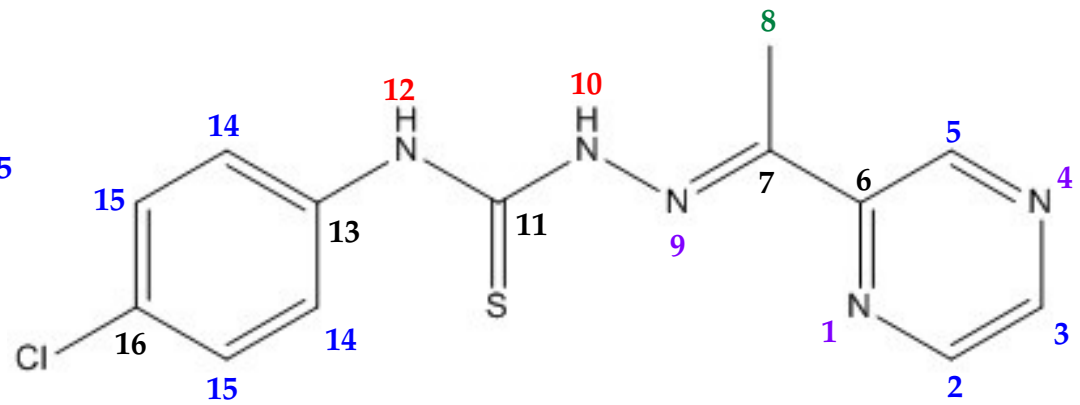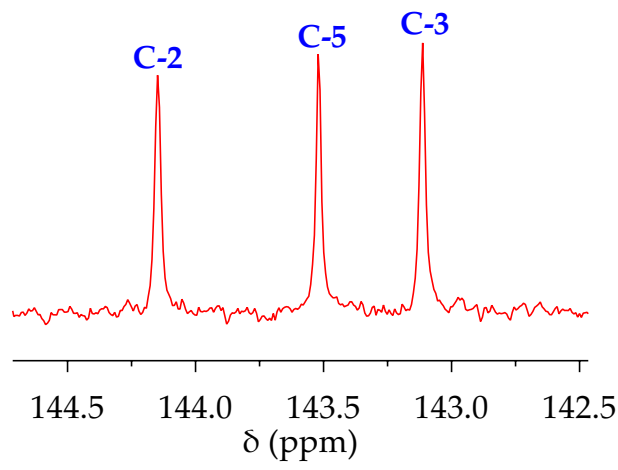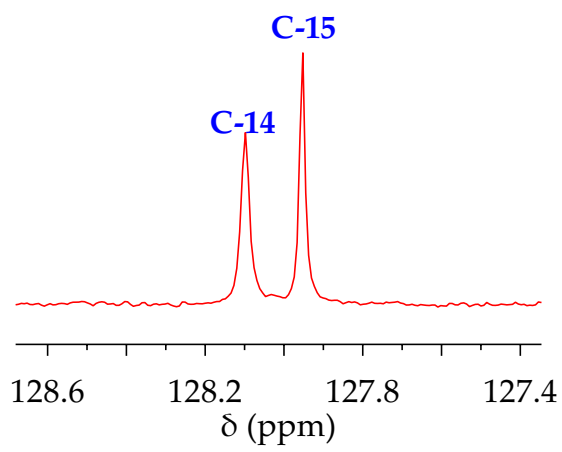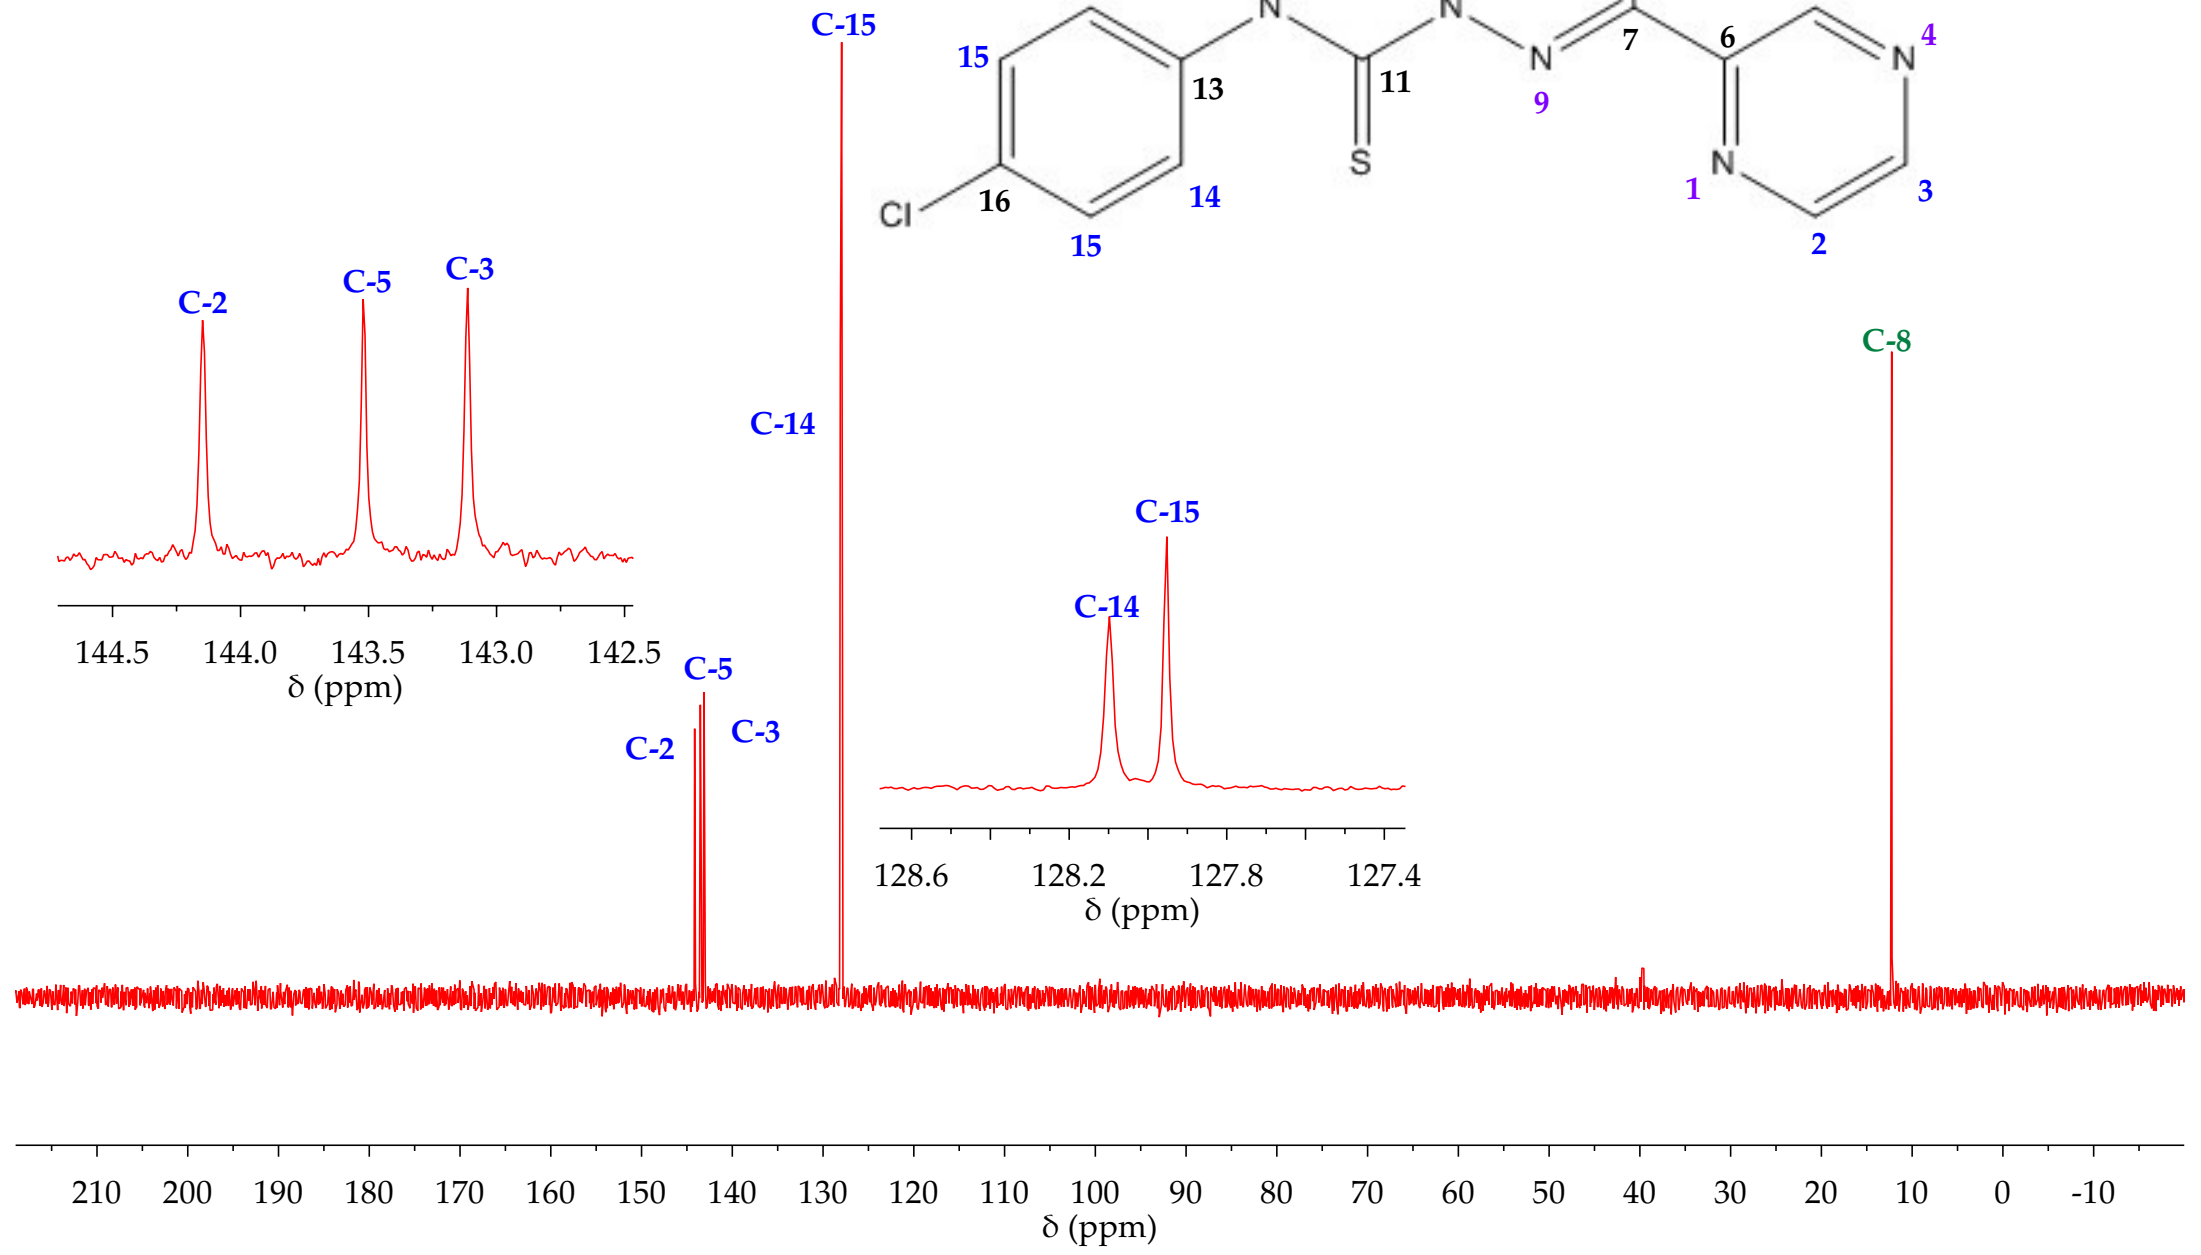

Supplement: f1 [file 3520837.f1.zip]

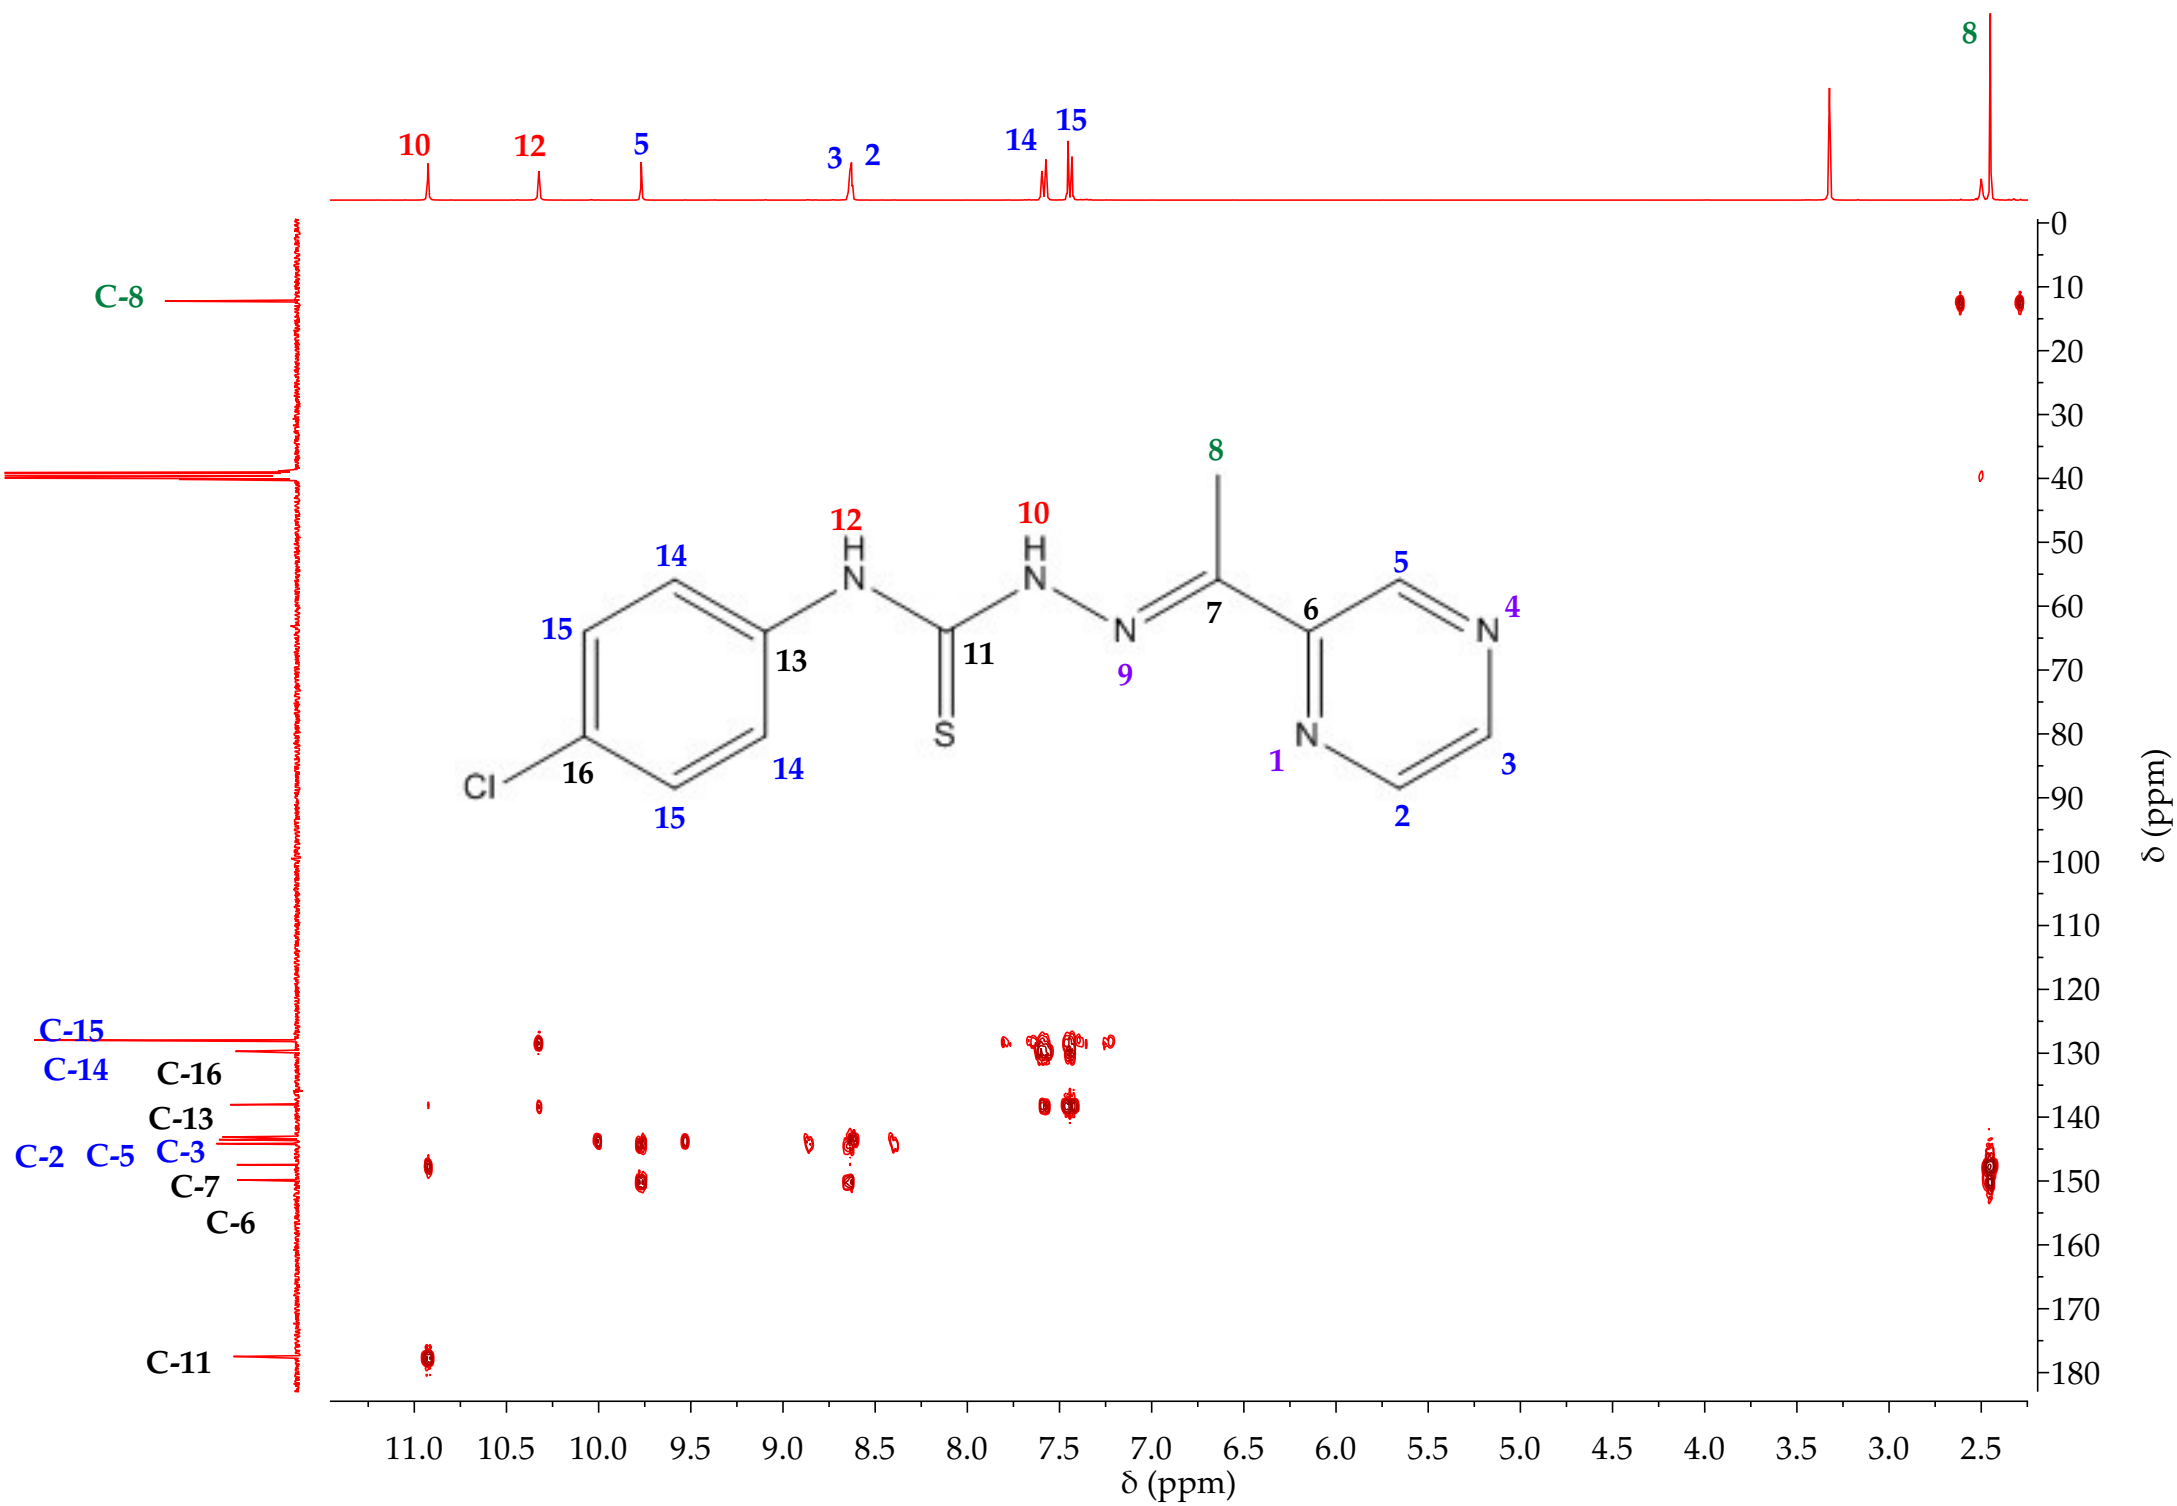

Supplement: f1 [file 3520837.f1.zip]

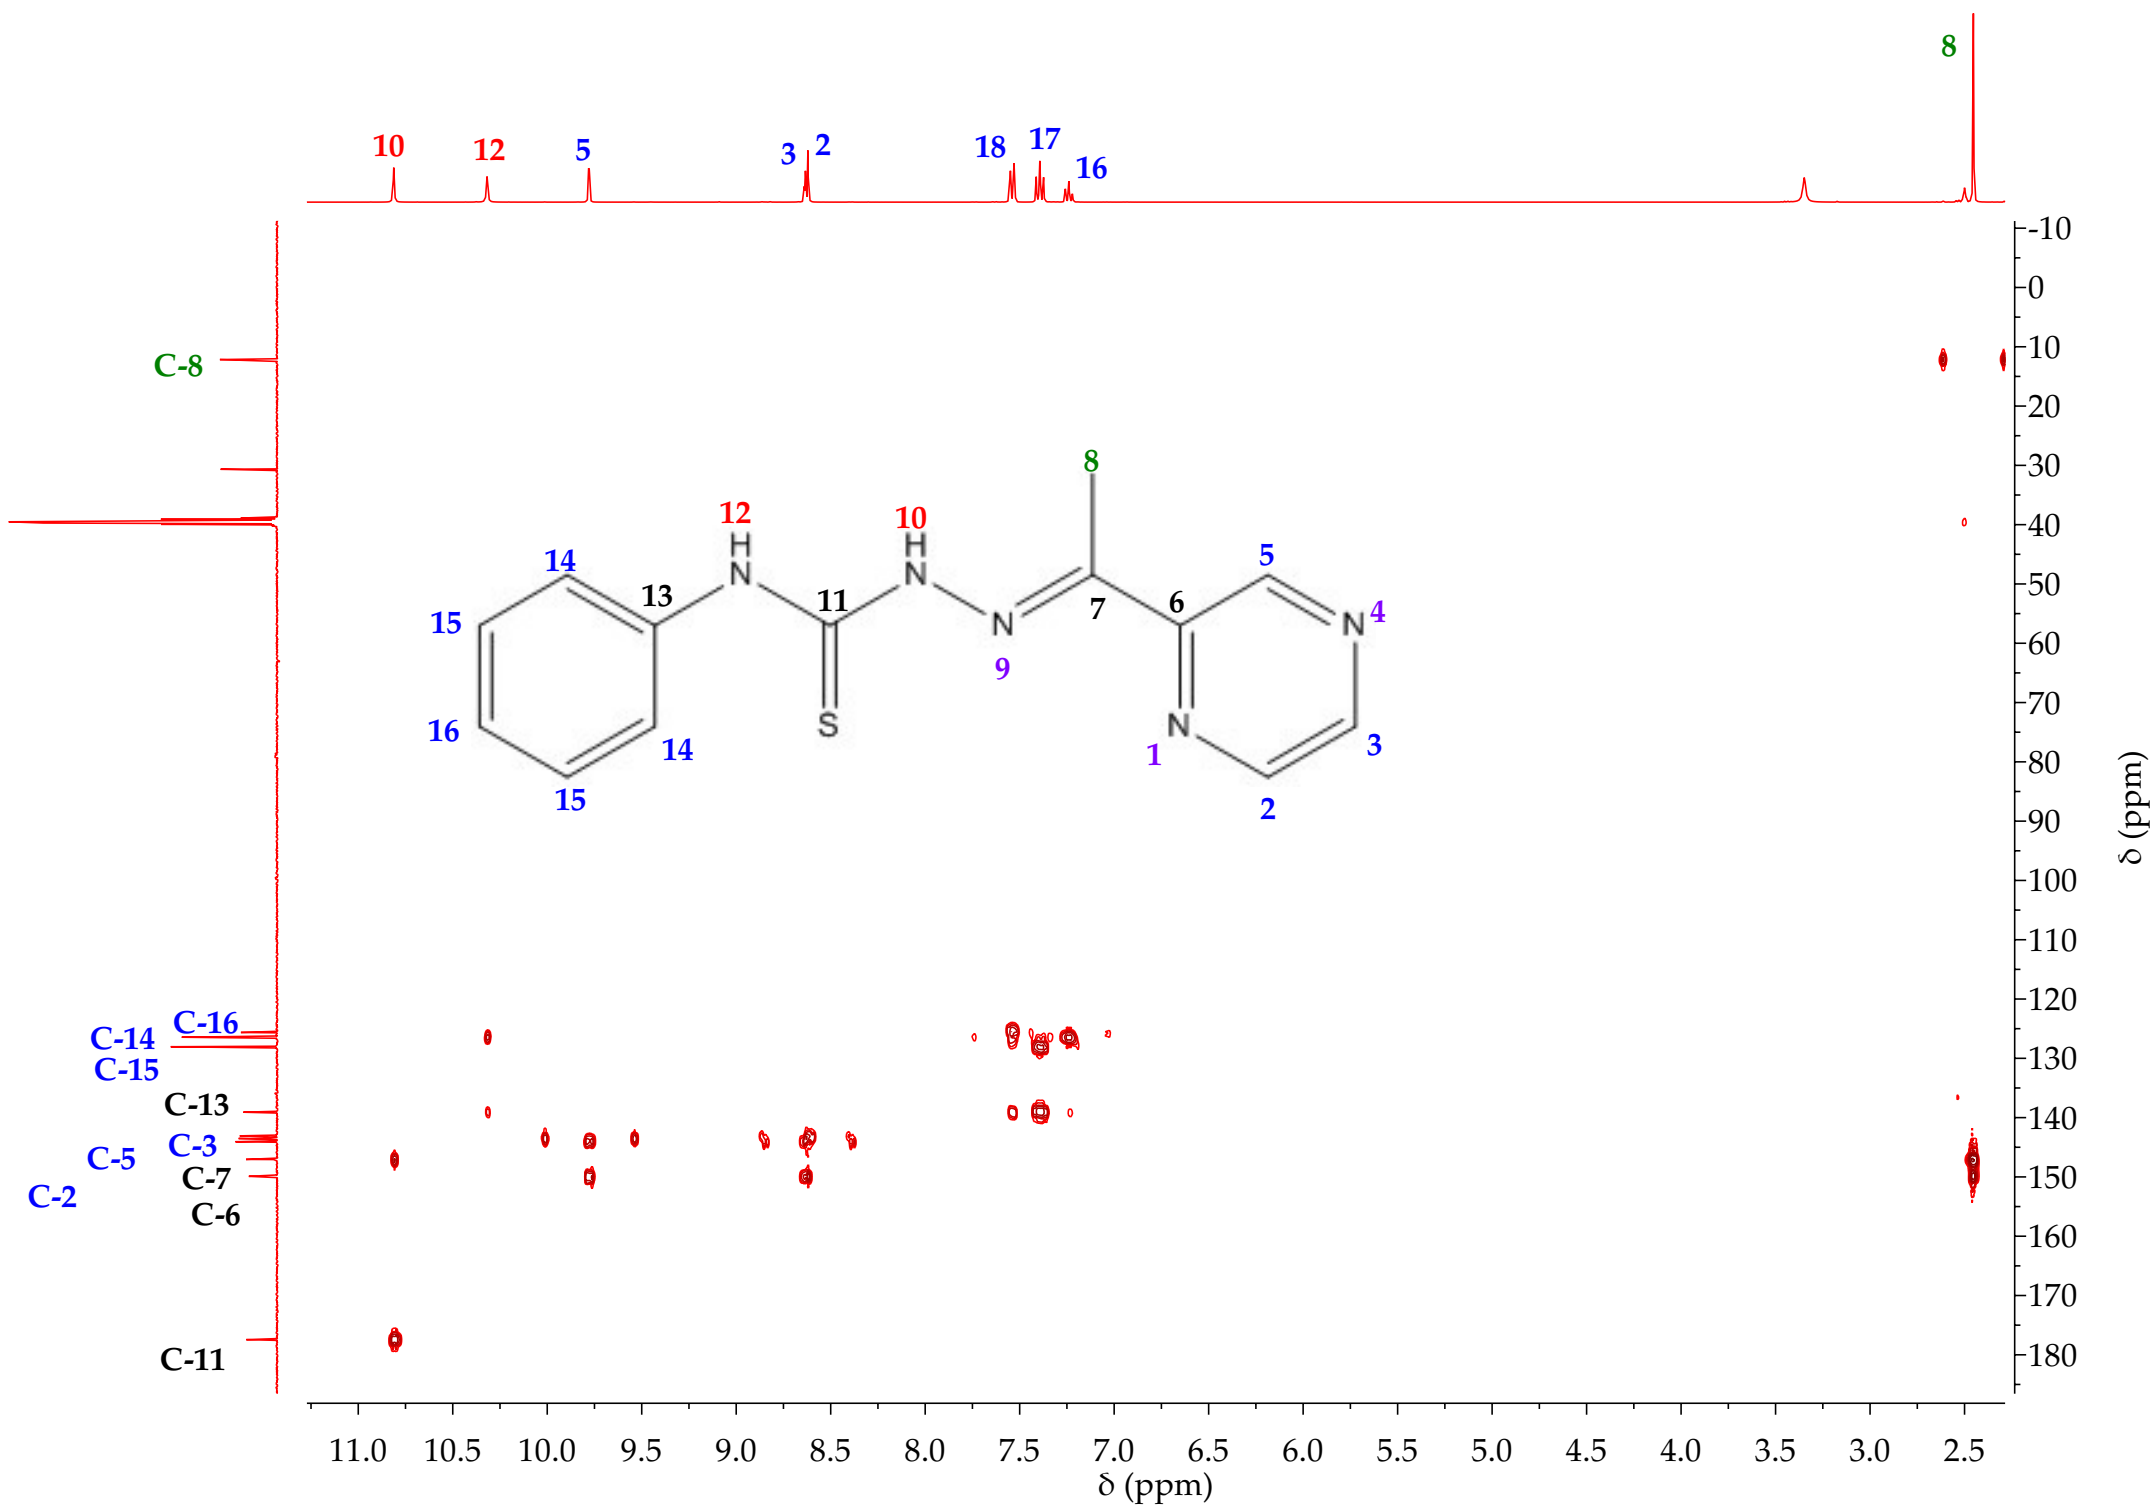

Supplement: f1 [file 3520837.f1.zip]

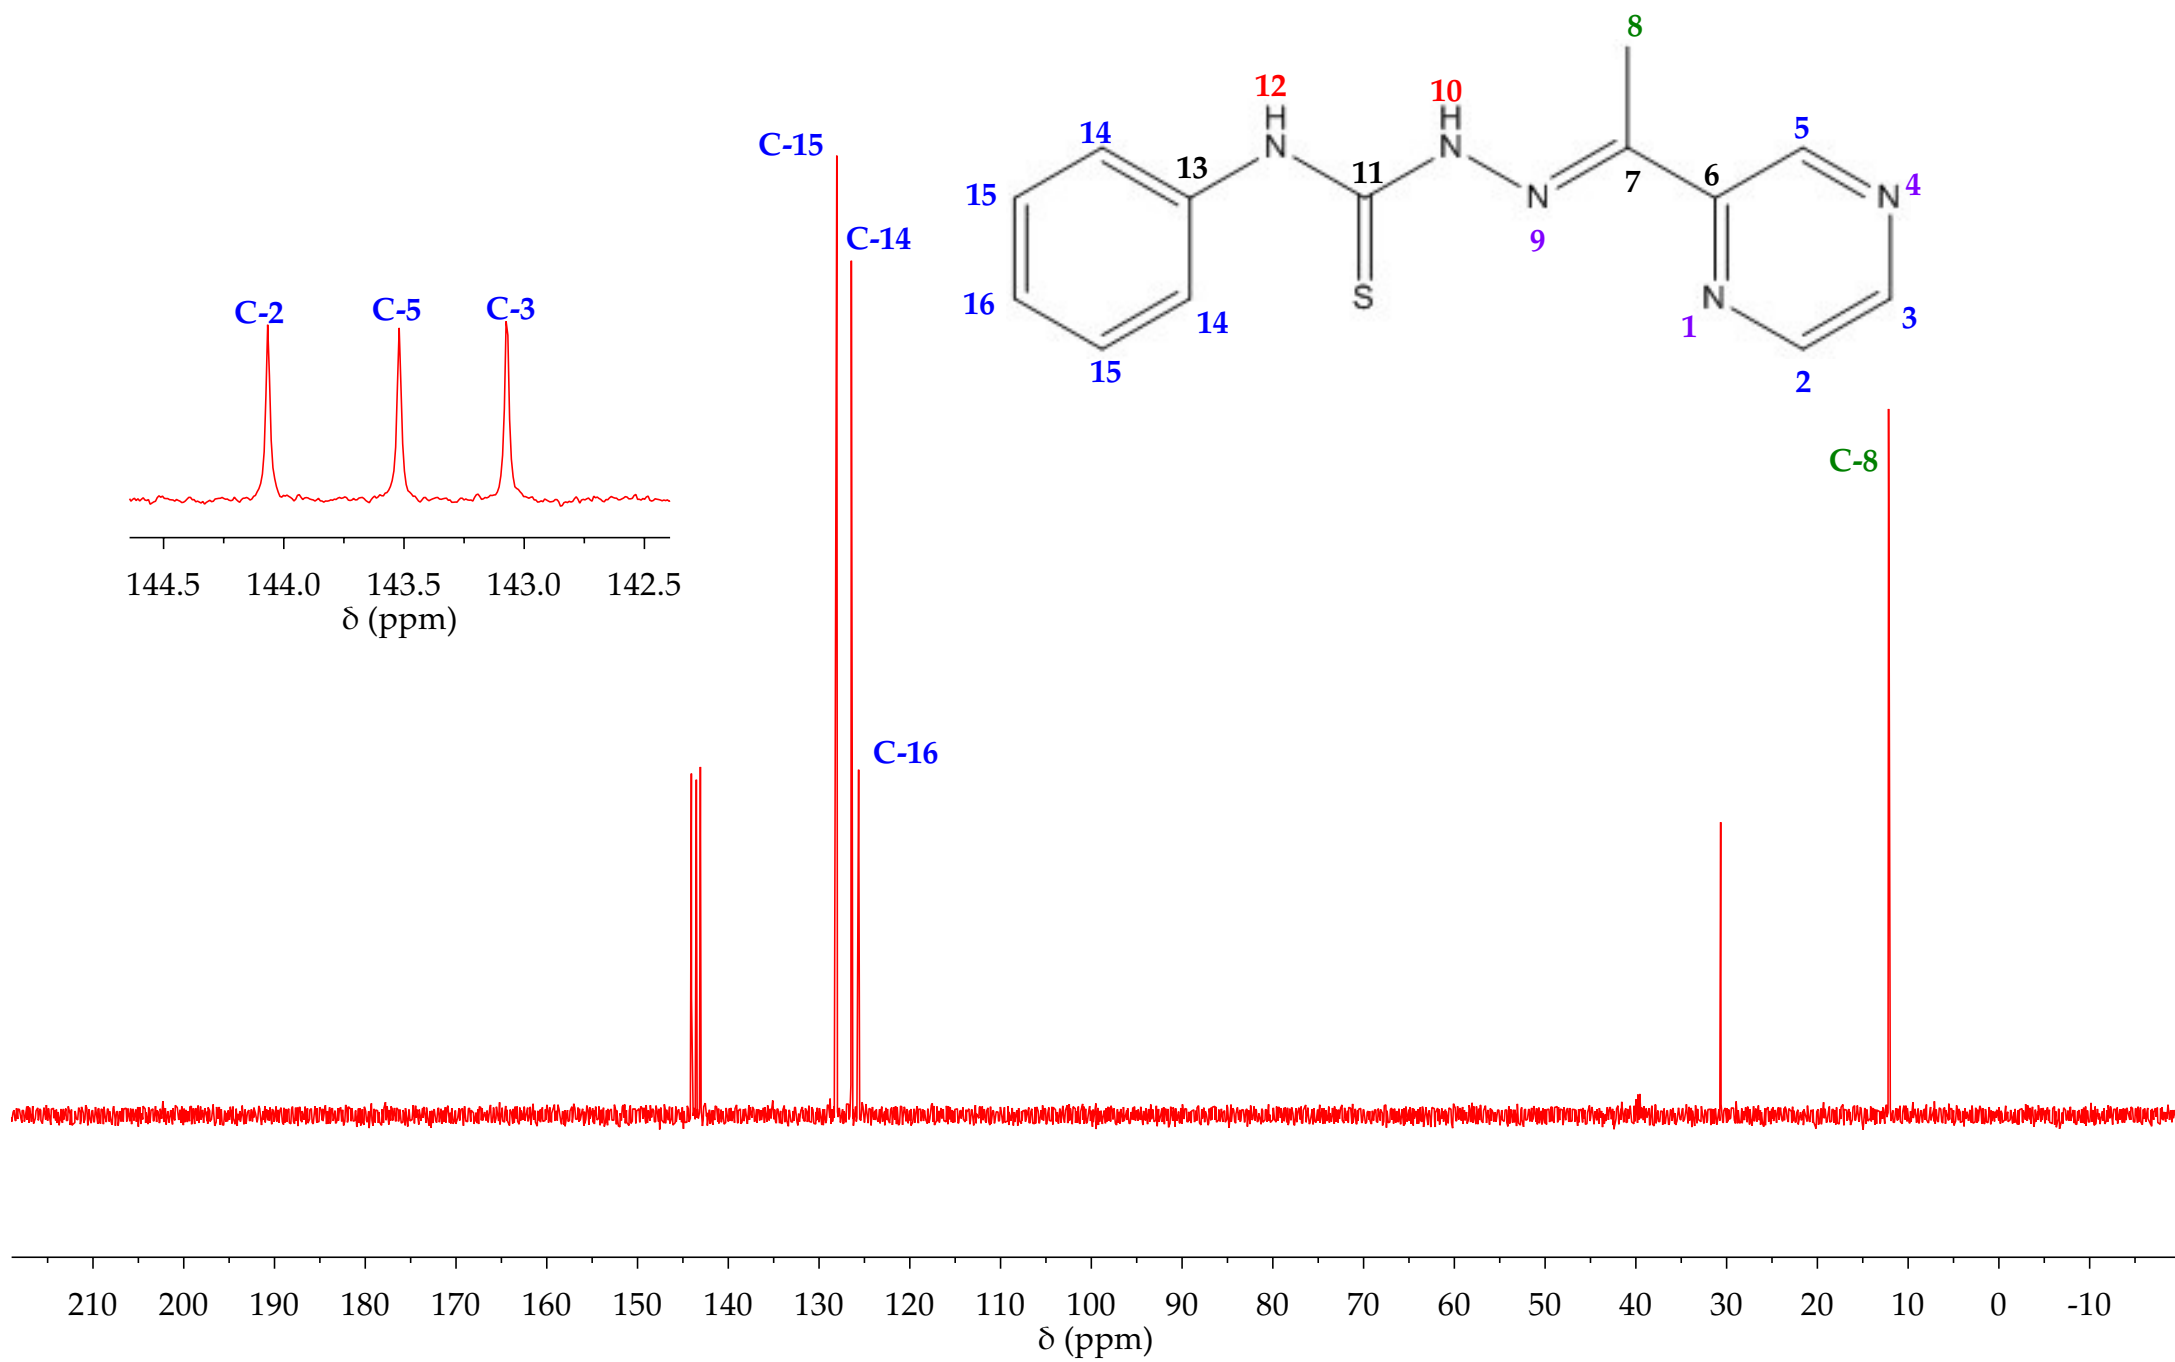

Supplement: f1 [file 3520837.f1.zip]

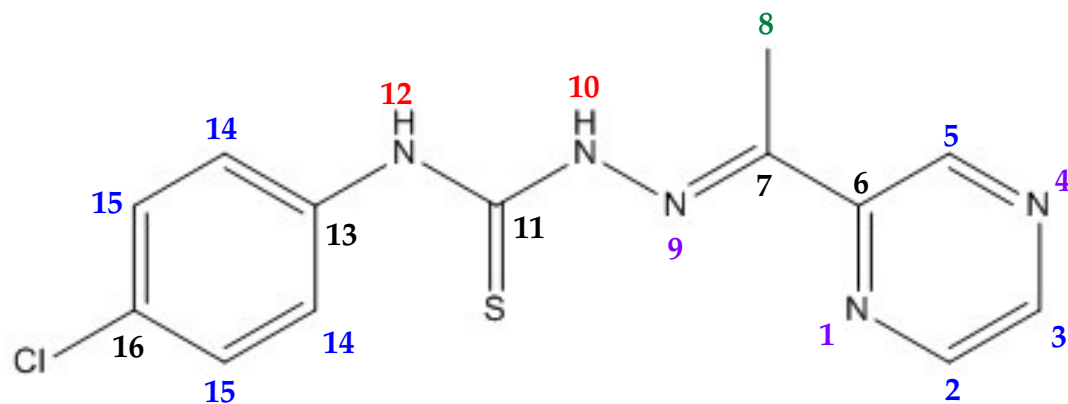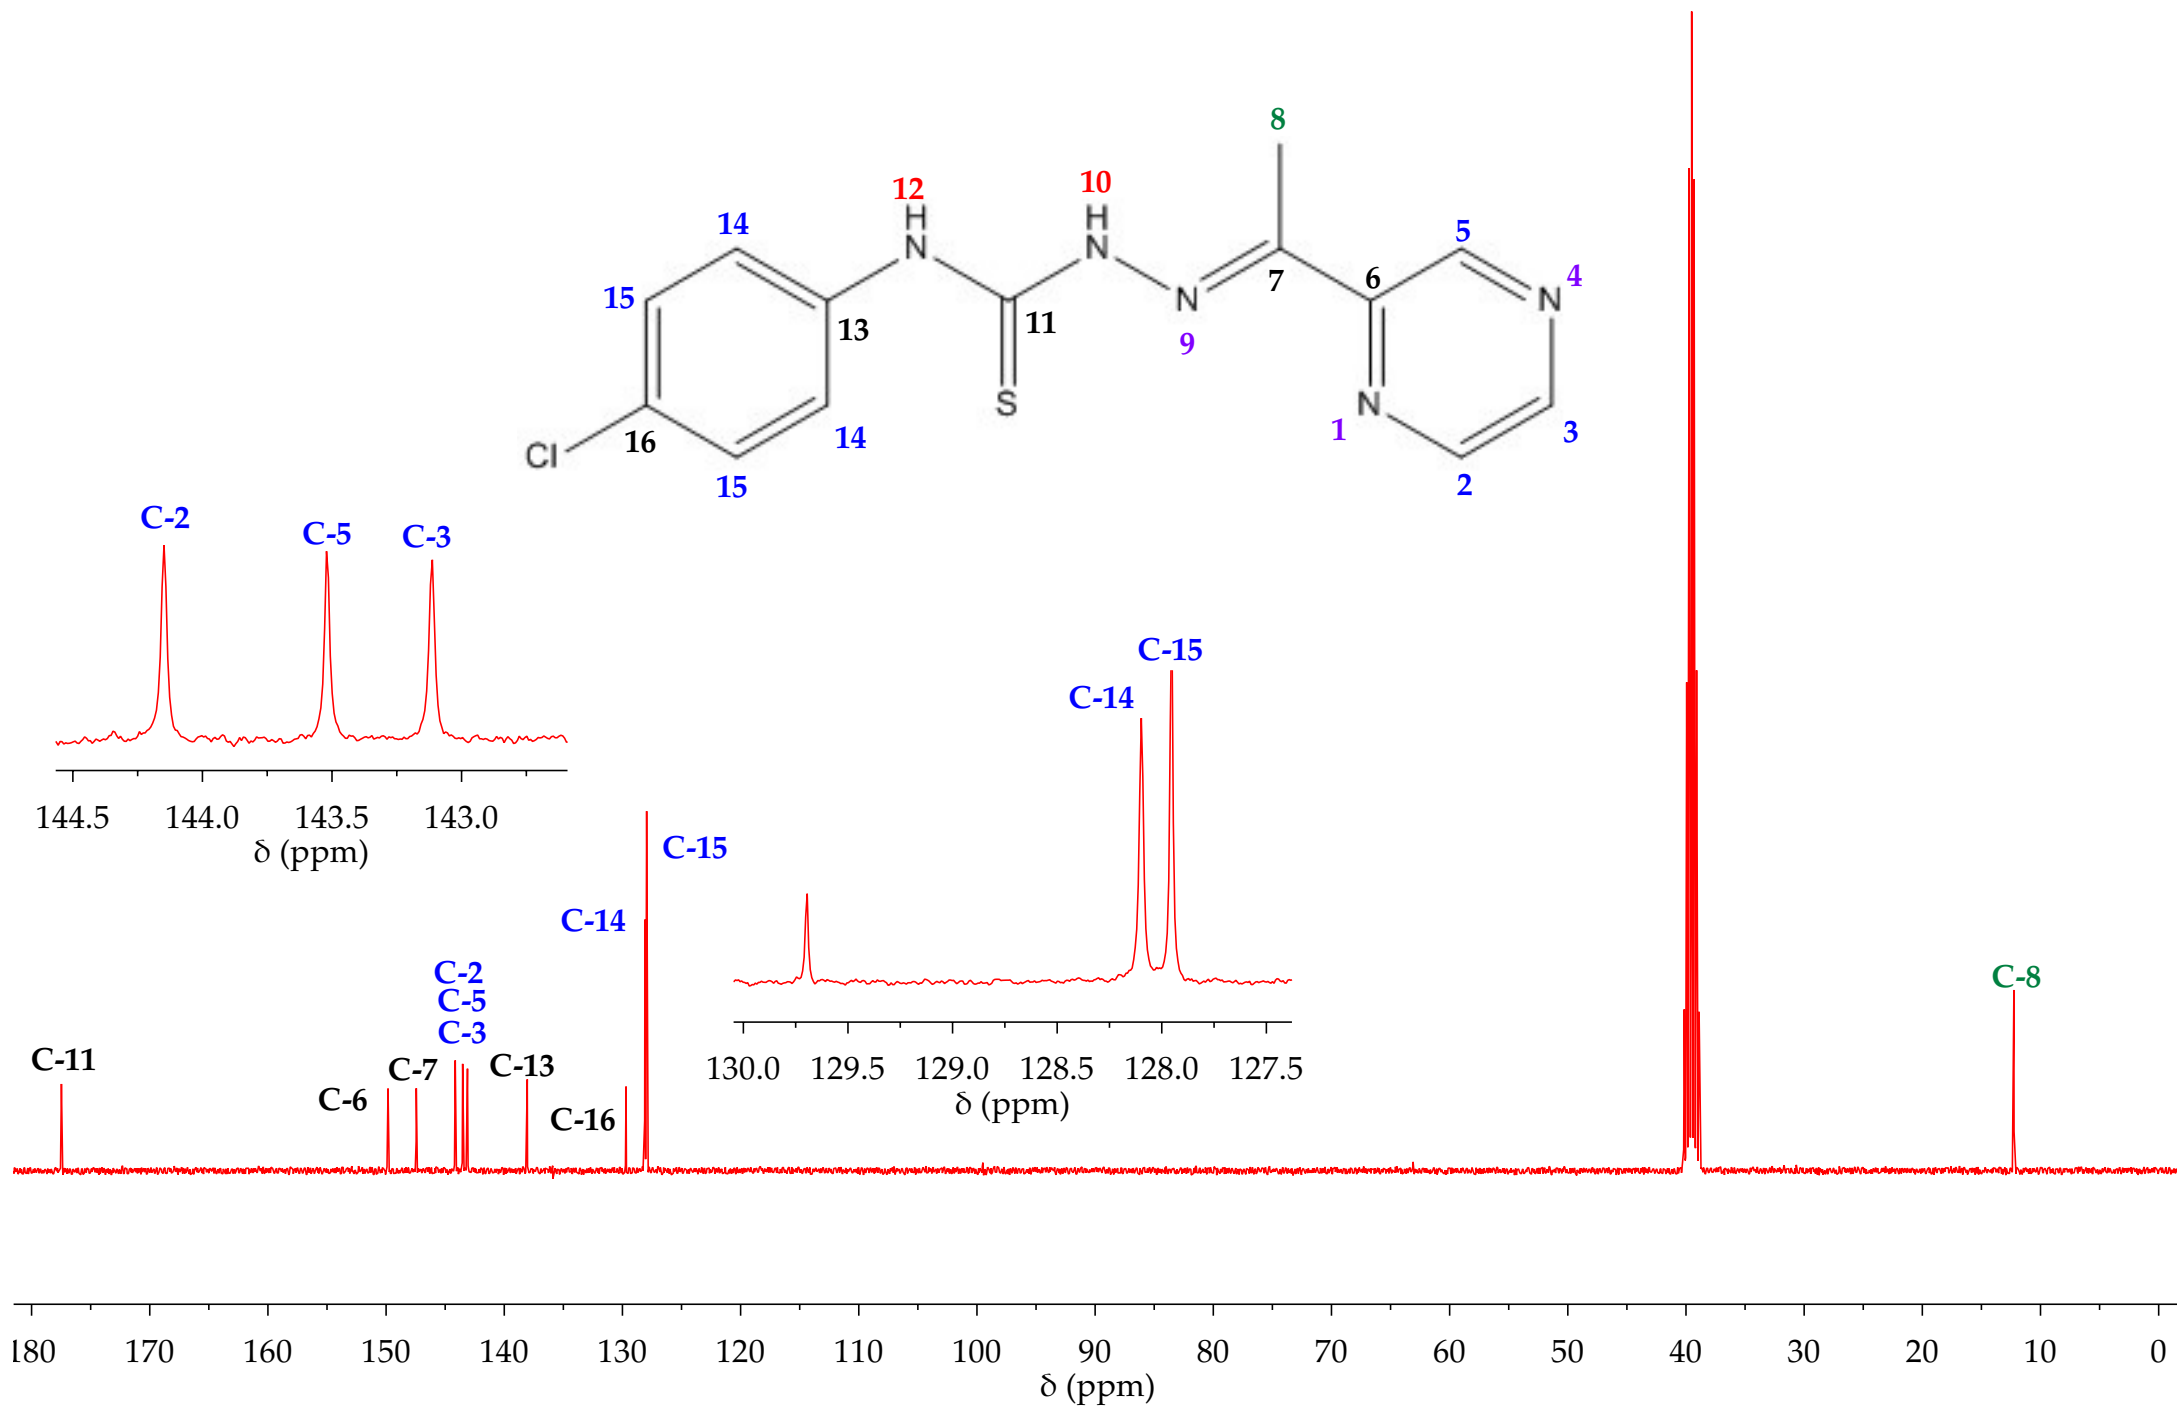

Supplement: f1 [file 3520837.f1.zip]

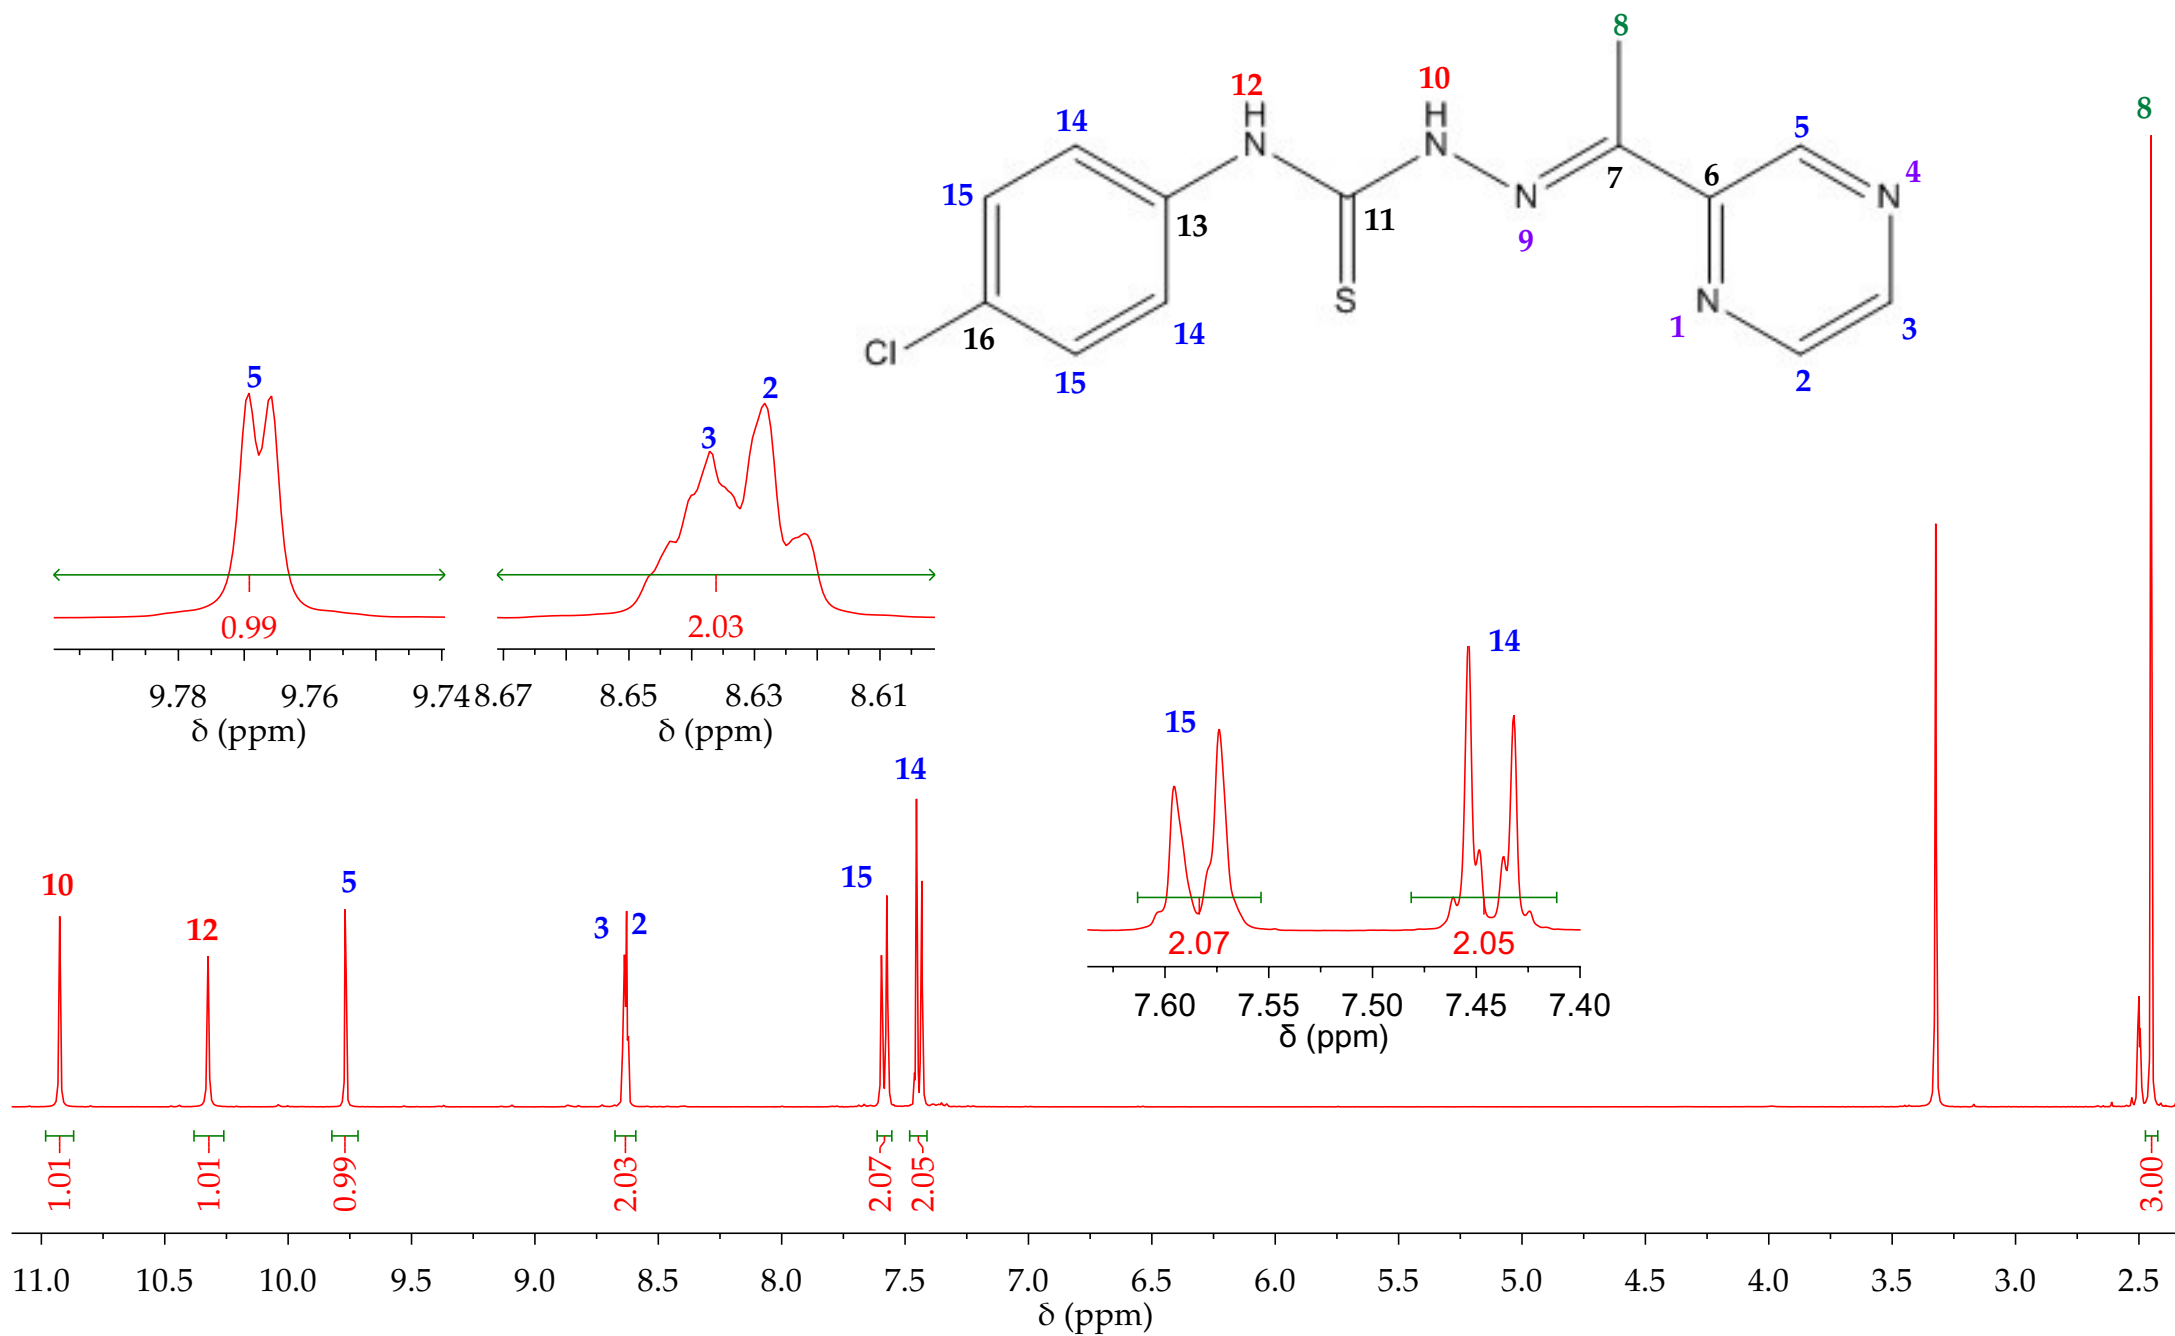

Supplement: f1 [file 3520837.f1.zip]

C-8

C-15

C-14

C-3  
C-5

C-2

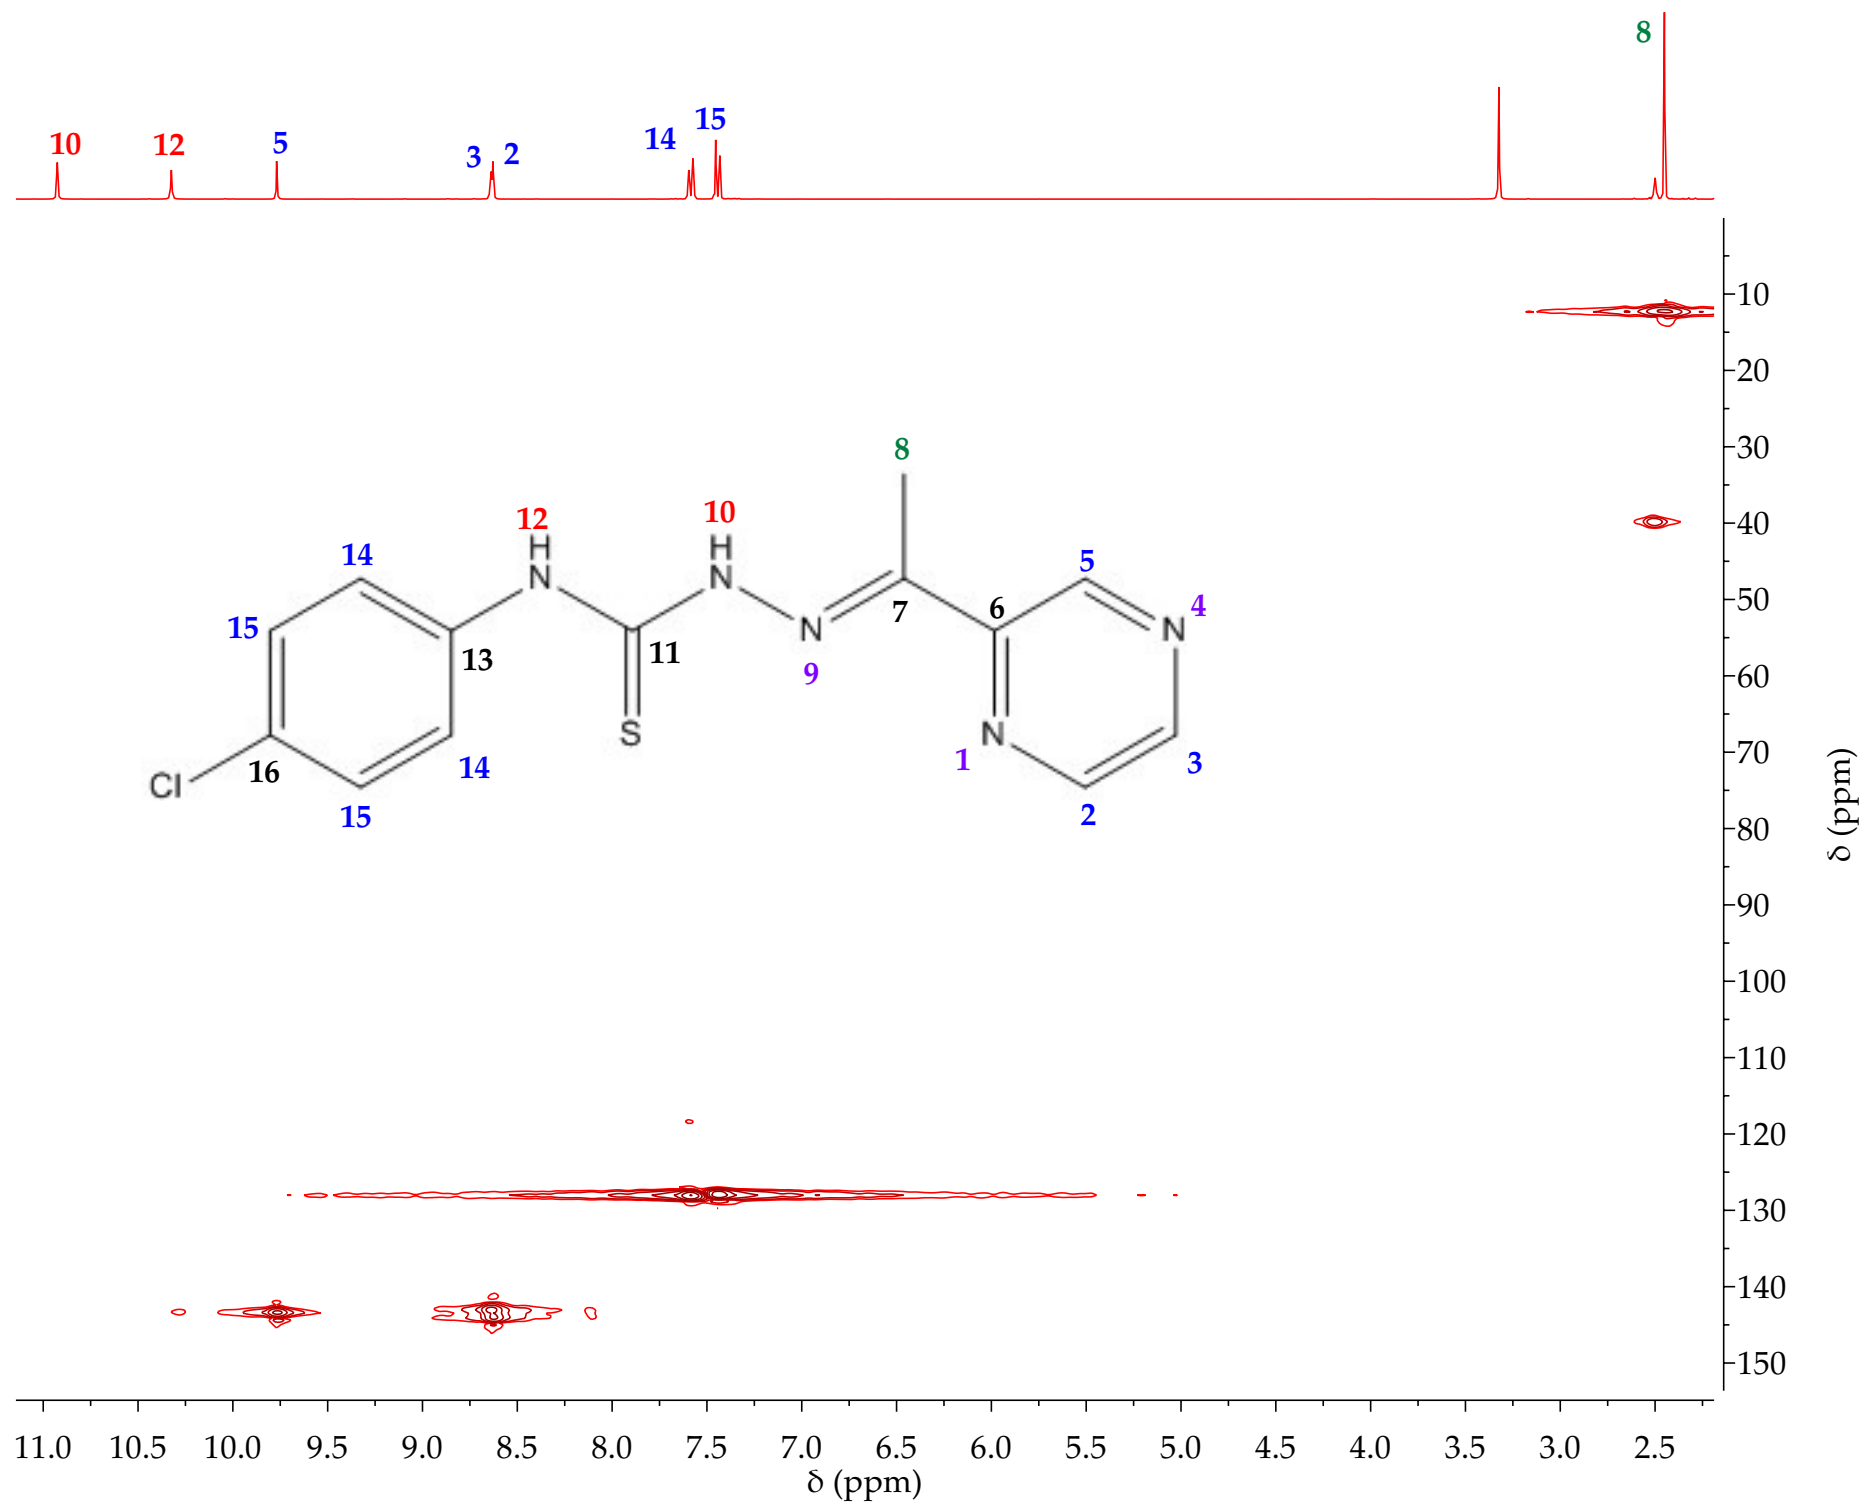

Supplement: f1 [file 3520837.f1.zip]

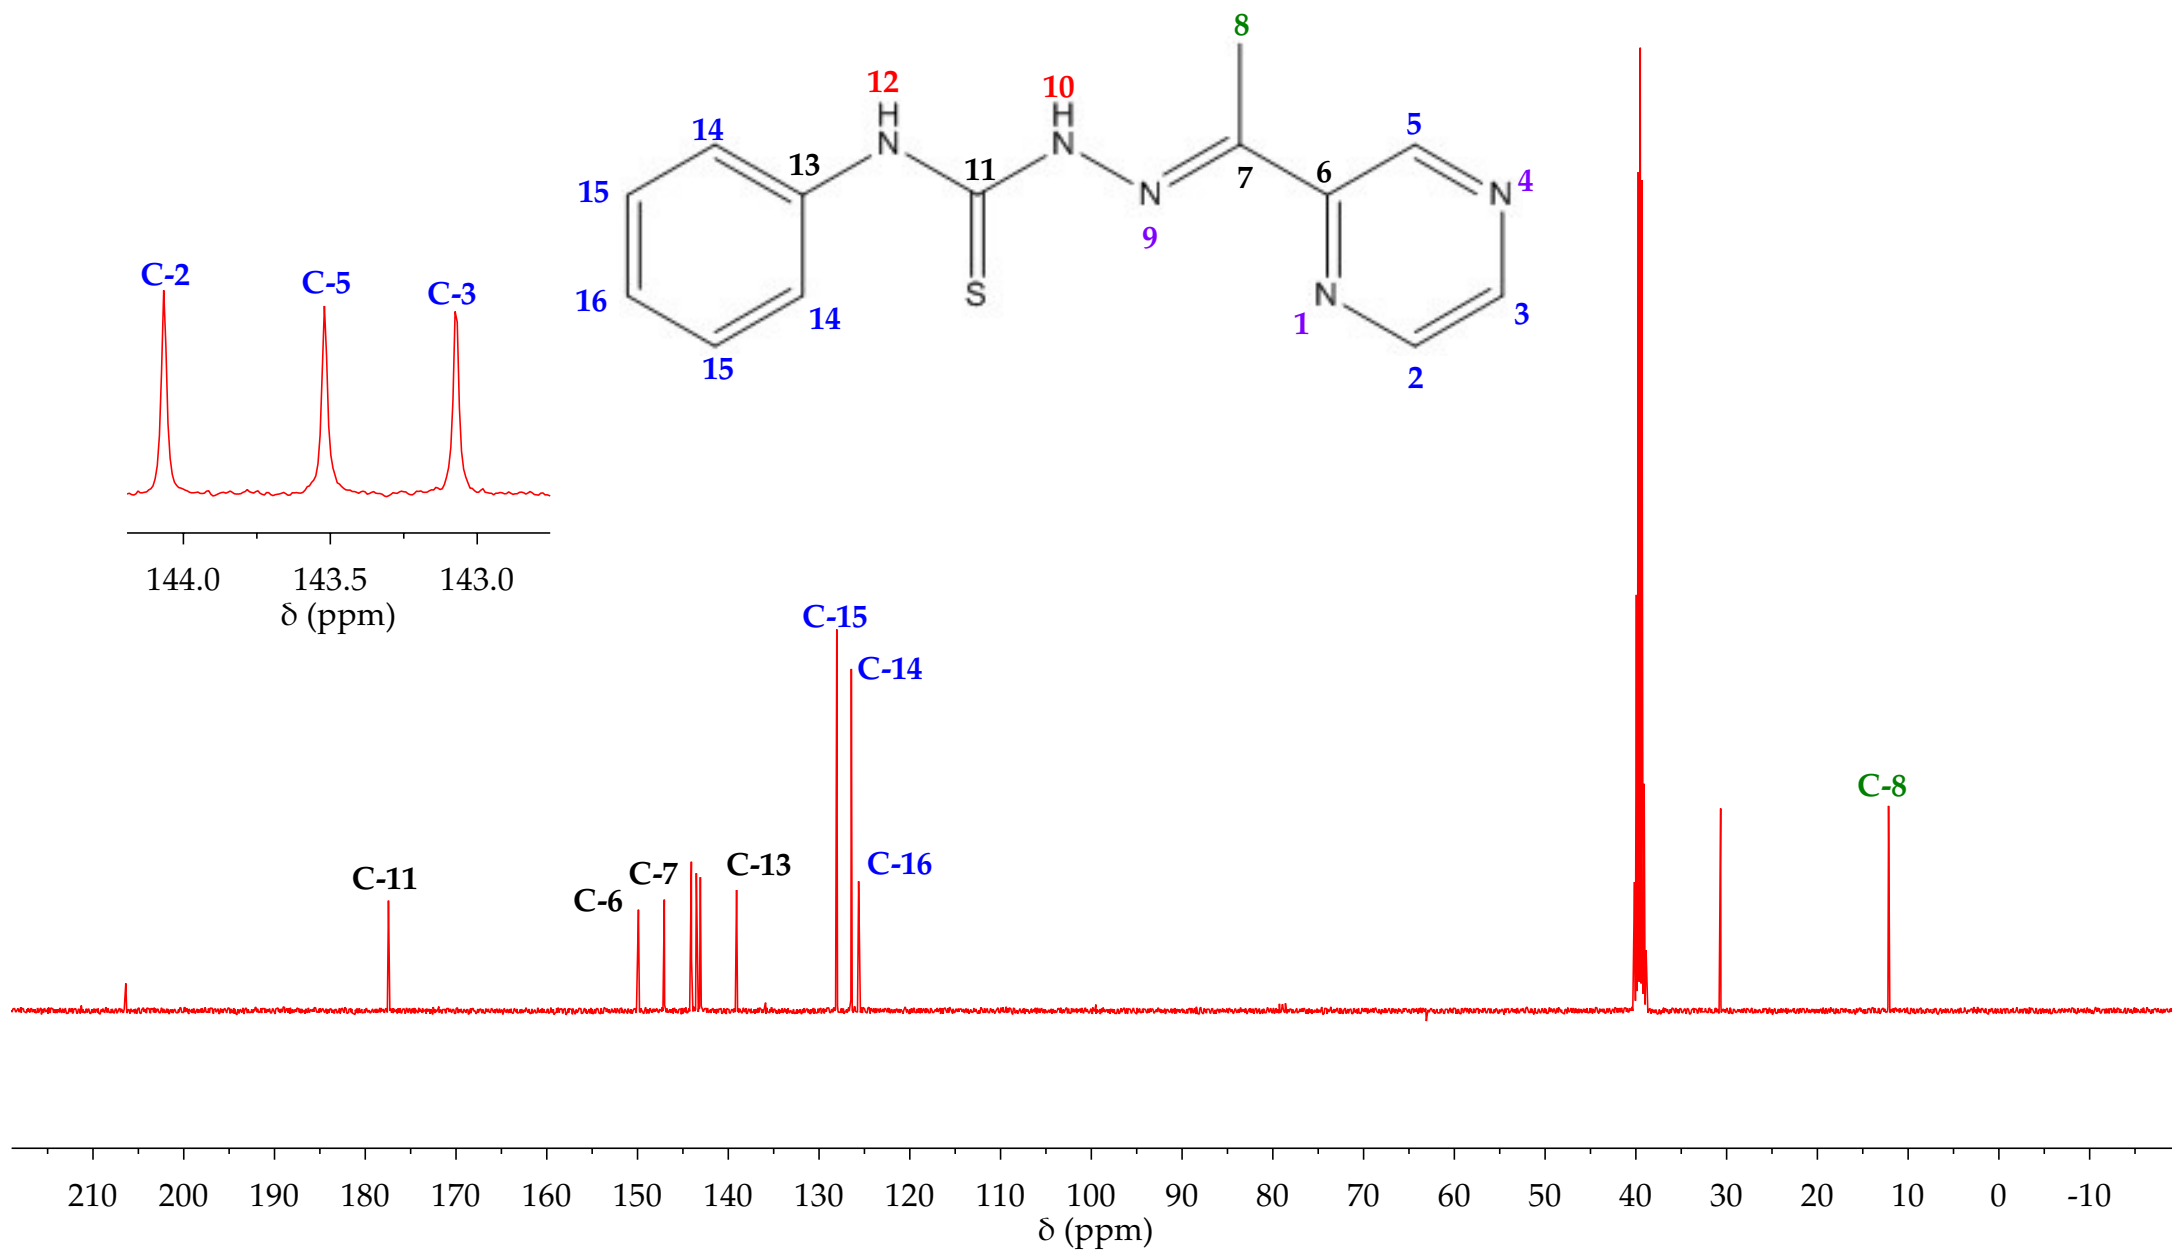

Supplement: f1 [file 3520837.f1.zip]
